# Supplementary material
Source: HighWire-hosted journal article supplement (https://bmjpaedsopen.bmj.com/content/suppl/2021/01/20/10.1136.bmjpo-2020-000861)
Supplement: bmjpo-2020-000861supp001_data_supplement.pdf [file bmjpo-2020-000861supp001_data_supplement.pdf]

## SUPPLEMENTARY MATERIAL

**eTable 1: Comparison of Patient Characteristics of the Included and Excluded Patients**

|                                     | <b>Excluded patients<br/>(n=16)</b> | <b>Included patients<br/>(n=187)</b> | <b>p-value</b> |
|-------------------------------------|-------------------------------------|--------------------------------------|----------------|
| Age at presentation                 |                                     |                                      | 0.811          |
| 0-28 days, n (%)                    | 7 (43.8)                            | 79 (42.2)                            |                |
| 29-60 days, n (%)                   | 4 (25.0)                            | 60 (32.1)                            |                |
| 61-90 days, n (%)                   | 5 (31.2)                            | 48 (25.7)                            |                |
| Gender                              |                                     |                                      |                |
| Male, n (%)                         | 12 (75.0)                           | 109 (58.3)                           | 0.191          |
| Ethnicity, n (%)                    |                                     |                                      | 0.170          |
| Chinese                             | 7 (43.8)                            | 101 (54.0)                           |                |
| Malay                               | 6 (37.5)                            | 62 (33.1)                            |                |
| Indian                              | 0 (0.0)                             | 13 (7.0)                             |                |
| Others                              | 3 (18.7)                            | 11 (5.9)                             |                |
| Maternal Positive GBS status, n (%) | 1 (6.3)                             | 36 (19.3)                            | 0.196          |
